# Supplementary material for: A Generic Platform for Cellular Screening Against Ubiquitin Ligases
Source: PubMed Central journal article supplement (PMC4705515; doi:10.1038/srep18940), 2016-01-08
Supplement: srep18940-s1.pdf [file srep18940-s1.pdf]

## **A Generic Platform for Cellular Screening Against Ubiquitin Ligases**

### **Authors**

Timurs Maculins, Nikki Carter, Thierry Dorval, Kevin Hudson, J. Willem M. Nissink, Ronald T. Hay and Husam Alwan.

## Supplementary Figure S1

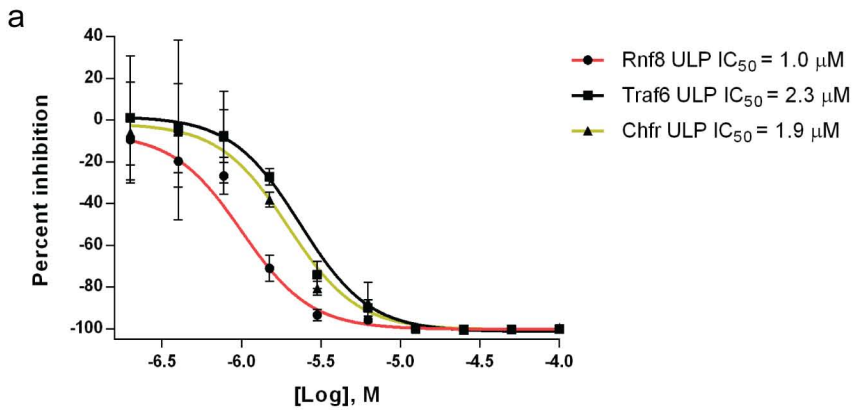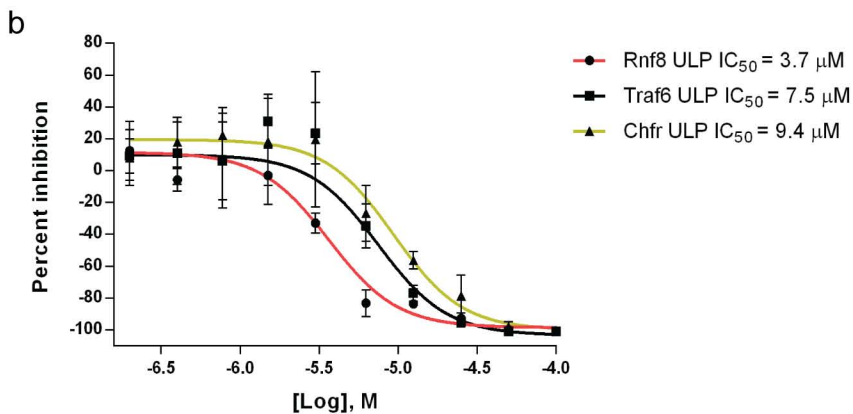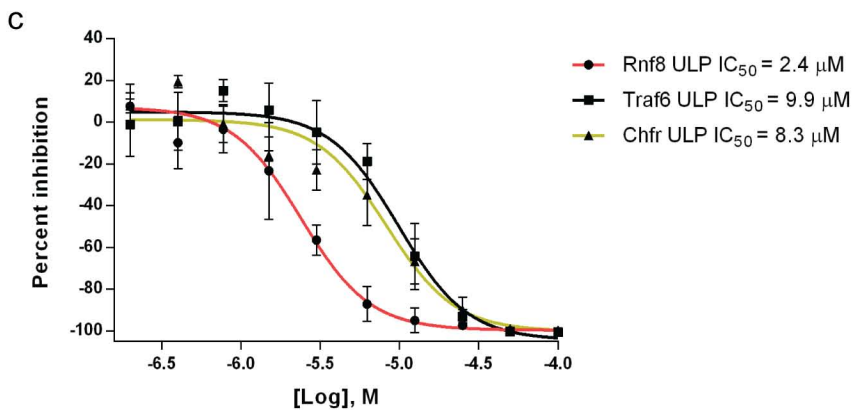

**Supplementary Figure S1.** Examples of compounds with different selectivity profiles. Dose-response curves for (a) a deprioritized compound lacking preferential inhibition of the Rnf8 ULP assay, (b) a compound exhibiting selectivity for Rnf8 ULP assay less than 0.5 log units and (c) a compound exceeding our minimal selectivity threshold of 0.5 log units against Rnf8 ULP assay (n=5).

## Supplementary Figure S2

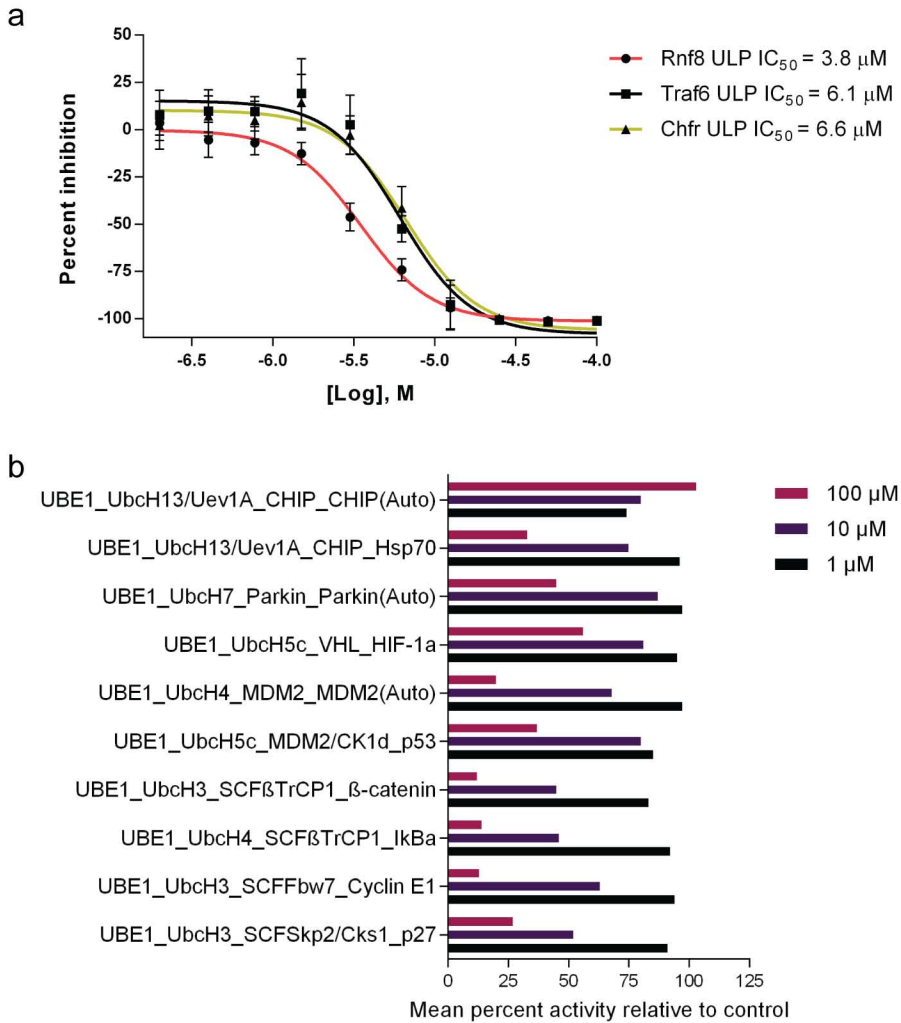

**Supplementary Figure S2.** Non-specific effect of compound-2. **(a)** Compound lacking preferential inhibition of Rnf8 in the ULP assays (n=5). **(b)** Compound-2 exhibits non-selective inhibition of the majority of indicated ubiquitylation cascades *in vitro* (n=2).

**Supplementary Table S1. Details of PCR primers used in this study.**

| Primer | Description      | Primer sequence                                 |
|--------|------------------|-------------------------------------------------|
| 9      | Sgfl RNF8 5'     | GACCGCGATCGCCATGGGGGAGCCCGGCTTCTT               |
| 10     | Pmel RNF8 3'     | GTCGGTTTAAACTCAGAACAATCTCTTTGCTTTTCGTTCCC       |
| 25     | Sgfl 3XUIM-7A 5' | CACCGCGATCGCCATGACAGAGGAGGAACAGTTCGCCCTTG       |
| 26     | Pmel 3XUIM-7A 3' | CTTGGTTTAAACCTAGGAAGGCCTACAGGAATTCAGGGATTCTGC   |
| 37     | RNF8 t1207a FW   | TGTGCTAGAGAATGAGCTCCAAAGTATTATTTGTTTCAGAATACTTC |
| 38     | RNF8 t1207a RV   | GAAGTATTCTGAACAAATAATACTTTGGAGCTCATTCTCTAGCACA  |
| 62     | Sgfl-CHFR 5'     | CACGGCGATCGCCATGGAGCGGCCCGAGGAAGGC              |
| 63     | Pmel-CHFR 3'     | TTCTGTTTAAACTTAGTTTTTGAACCTTGTCTGTTACAGAT       |
| 121    | Sgfl-TRAF6 5'    | TTGTGCGATCGCCATGAGTCTGCTAAACTGTGAA              |
| 122    | Pmel-TRAF6 3'    | GGGGGTTTAAACTCATACCCCTGCATCAGTACTT              |
| 172    | TRAF6 R88A FW    | ACGCCATGCGGCCATGCGTTCTGCAAAGCCTG                |
| 173    | TRAF6 R88A RV    | CAGGCTTTCAGAACGCATGGCCGCATGGCGT                 |
| 182    | FW CHFR W240A    | CTTGCTACTCGGGCGCGATGGAGCGCTCGT                  |
| 183    | RV CHFR W240A    | ACGAGCGCTCCATCGCGCCCGAGTAGCAAG                  |

**Supplementary Table S2. Details of constructs used in this study.**

| Construct name | Vector Backbone | Insert Description   |
|----------------|-----------------|----------------------|
| pTM4           | pFN11A          | Sgfl-Pmel RNF8       |
| pTM10          | pFN10A          | Sgfl-Pmel TUBEs      |
| pTM20          | pFN11A          | Sgfl-Pmel RNF8 C403S |
| pTM40          | pFN11A          | Sgfl-Pmel CHFR       |
| pTM48          | pFN11A          | Sgfl-Pmel TRAF6      |
| pTM61          | pFN11A          | Sgfl-Pmel CHFR W240A |
| pTM63          | pFN11A          | Sgfl-Pmel TRAF6 R88A |
| pBIND          | pFN11A          | Empty control vector |

|                 |         |                      |
|-----------------|---------|----------------------|
| pACT            | pFN10A  | Empty control vector |
| Reporter Vector | pGL4.31 | Firefly Luciferase   |
